# Supplementary material for: Best Practices for Point of Care Ultrasound: An Interdisciplinary Expert Consensus
Source: PubMed Central journal article supplement (PMC11044939; doi:10.24908/pocus.v9i1.17240), 2024-04-22
Supplement: pocusj-09-17240-s001.pdf [file pocusj-09-17240-s001.pdf]

## Appendix A: Expert panel affiliations, training, and background

### Anesthesiology and Critical Care

#### Aliaksei Pustavoitau, MD, MHS, FCCM

Department of Anesthesiology and Critical Care Medicine

Johns Hopkins University

Baltimore, MD

- Associate Professor of Anesthesiology and Critical Care Medicine, Johns Hopkins University School of Medicine
- Director, Perioperative Ultrasound, Department of Anesthesiology and Critical Care Medicine, Johns Hopkins University
- Testamur, NBE Special Competency in Critical Care Echocardiography (CCEeXAM)
- Diplomate, NBE Basic Perioperative Transesophageal Echocardiography (PTEeXAM)
- Instructor, Adult Critical Care Ultrasound course, SCCM
- Co-founder, Introduction to Point-of-Care Ultrasound in Life Support and Sepsis course, SCCM
- Co-director, Point-of-Care Ultrasound in Life Support course, New York State Society of Anesthesiologists Postgraduate Assembly
- Past co-chair, Ultrasound Certification Task Force, SCCM
- Co-editor, *Comprehensive Critical Care Ultrasound (1<sup>st</sup> ed)*, SCCM

## **Emergency Medicine**

### **Andrew Goldsmith, MD, MBA**

Department of Emergency Medicine

Brigham and Women's Hospital

Boston, MA

- Division Chief, Emergency Ultrasound, Brigham and Women's and Faulkner Hospital
- Co-Director, Society of Academic Emergency Medicine Ultrasound-Guided Nerve Block Course

### **Meghan Kelly Herbst, MD, FACEP**

Department of Emergency Medicine

UConn Health

Farmington, CT

- Professor of Emergency Medicine, University of Connecticut School of Medicine
- Director, Point-of-Care Ultrasound, Department of Emergency Medicine, UConn Health
- Chair, Ultrasound Section, ACEP
- Question writer, Advanced Emergency Medicine Ultrasonography Focused Practice Designation Exam, ABEM

**Viveta Lobo, MD, FACEP**

Department of Emergency Medicine

Stanford University

Stanford, CA

- Clinical Associate Professor, Emergency Medicine, Stanford
- Director of POCUS, Department of Emergency Medicine, Stanford
- Co-Director of POCUS, Stanford Hospital & Clinics
- Board member, Clinical Ultrasound Accreditation Program (CUAP), ACEP

**Emergency and Prehospital Medicine**

**Carl William Lange, IV, MSBS, EM-CAQ, PA-C**

1. Emergency Medicine

Phelps Health

Rolla, MO

2. Prehospital Medicine PA

North Crawford County Ambulance District

Cuba, MO

- CEO and Lead Instructor, Practical POCUS

- Committee Member for PAs in EMS, SEMPA
- SEMPA Liaison, Missouri College of Emergency Physicians
- Adjunct Professor, Saint Louis University Physician Assistant Program
- Adjunct Professor, Missouri State University Physician Assistant Program
- Adjunct Professor, Stephens College Physician Assistant Program

### **Emergency and Internal Medicine**

**Jason T Nomura, MD, FACEP, FAAEM, FACP, FAHA**

Department of Emergency Medicine

Christiana Care Health System

Newark, DE

- Director, Emergency Ultrasound, Thomas Jefferson University
- Advanced Emergency Medicine Ultrasound Fellowship Director, Christiana Care Health System
- Medical Director, Systemwide Point of Care Ultrasound, Thomas Jefferson University
- Associate Professor of Emergency Medicine & Associate Professor of Medicine, Sidney Kimmel Medical College at Thomas Jefferson University
- Focused Practice Designation Advanced Emergency Medicine Ultrasound (FPD-AEMUS), American Board of Emergency Medicine

## Cardiology

**James N. Kirkpatrick, MD, FASE, FACC**

Division of Cardiology and Department of Bioethics and Humanities

University of Washington

Seattle, WA

- Professor of Medicine, Department of Cardiology, University of Washington
- Professor of Bioethics and Humanities, University of Washington
- Section Chief, Cardiac Imaging, University of Washington Medical Center
- Director, Echocardiography Laboratories, University of Washington Medical Center
- Member, Critical Care Echocardiography Council, ASE
- Chair, ASE Foundation
- Diplomate, NBE Examination of Special Competence in Adult Echocardiography (ASCeXAM)
- Writing Committee, NBE Examination of Special Competence in Adult Echocardiography (ASCeXAM)
- Chair, ASE Guideline: Recommendations for Echocardiography Laboratories  
Participating in Cardiac Point of Care Cardiac Ultrasound (POCUS) and Critical Care Echocardiography Training: Report from the American Society of Echocardiography
- Chair, ASE Writing Group: Recommendations for Cardiac Point-of-Care Ultrasound Nomenclature

**Mourad H Senussi, MD**

Cardiology & Critical Care Medicine

Baylor College of Medicine

Texas Heart Institute

Houston, TX

- Assistant Professor, Baylor College of Medicine
- Director, Cardiac Intensive Care Unit, Baylor St. Luke's Medical Center
- Diplomate, NBE Examination of Special Competence in Adult Echocardiography (ASCeXAM)
- Diplomate, NBE Special Competency in Critical Care Echocardiography (CCEeXAM)

**Vincent L. Sorrell, MD, FACP (honorary), FACC, FASE, FSCCT, FSCMR**

Division of Cardiovascular Medicine

University of Kentucky

Lexington, KY

- Anthony N. DeMaria Professor of Medicine, University of Kentucky
- Chief, Division of Cardiovascular Medicine, University of Kentucky
- Acting Director, Gill Heart & Vascular Institute
- Level III echocardiographer, ACC
- Editor-in-Chief, CASE (Cardiovascular Imaging Case Reports)
- Co-director, Echo Florida, ASE

- Inaugural faculty, Steering Committee, NBE Critical Care Echocardiography Boards Review Course
- Member, Association of University Cardiologists
- Recipient, Richard Popp Excellence in Teaching Award, ASE
- Past member, Board of Directors, ASE
- Writing group member (POCUS nomenclature and standardized reporting), ASE
- Writer, Echocardiography Self-Assessment Program (EchoSAP), ACC
- Writer, Cardiac Catheterization and Interventional Cardiology Self-Assessment Program (CathSAP), ACC

### **Critical Care Medicine**

#### **Robert Baeten, PA-C, FCCP**

Cardiac Critical Care Service

Piedmont Heart Institute

Atlanta, GA

- Clinical Assistant Professor, Mercer University Physician Assistant Program
- Director, POCUS Curriculum, Mercer University Physician Assistant Program
- Founder and course director, POCUS for the Acute Care Provider, Mercer University Physician Assistant Program
- Former faculty, Post Graduate PA Residency in Cardiac Critical Care
- Co-creator, Focused Cardiac Ultrasound credentialing and QI workflow, Piedmont Hospital Atlanta

- Former member, Adult Critical Care Ultrasound Committee, SCCM

**Leon Chen, DNP, AGACNP-BC, FCCP, FAANP, FCCM**

Department of Anesthesiology and Critical Care Medicine

Memorial Sloan Kettering Cancer Center

New York, NY

- Associate Professor of Nursing, Columbia University School of Nursing
- Core POCUS Faculty, DNP/AGACNP/CRNA Programs, Columbia University School of Nursing
- Developed and supervises APP POCUS certification, Intensive Care Unit/Post-Anesthesia Care Unit/Step-Down Units, Memorial Sloan Kettering Cancer Center
- Co-Founder and Course Director, Critical Care Ultrasound Workshop, Memorial Sloan Kettering Cancer Center
- Diplomate, Critical Care Ultrasonography Certificate of Completion, American College of Chest Physicians

**Siddharth Dugar, MD, FCCM, FASE, FCCP**

Respiratory Institute, Department of Critical Care Medicine

Cleveland Clinic

Cleveland, OH

- Director of Point of Care Ultrasound, Department of Critical Care, Respiratory Institute, Cleveland Clinic



- Diplomate, NBE Special Competency in Critical Care Echocardiography (CCEeXAM)

**Michael J. Lanspa, MD**

Critical Care Medicine

Intermountain Medical Center and the University of Utah

Murray, UT

- Adjunct Associate Professor, Internal Medicine, University of Utah
- Director, Intermountain Critical Care Echocardiography Service
- Director, Intermountain Critical Care Echocardiography Core Imaging Research Lab
- Co-chair, Scientific Sessions Program Committee, ASE
- Co-chair, Critical Care Echocardiography Board Review course, SCCM
- Co-chair, American Thoracic Society Post Graduate Course: Critical Care Echocardiography and Ultrasonography
- Chair, Utah Thoracic Society Critical Care Echocardiography and Ultrasound Roundtable Summit.
- Course Faculty and Committee Member, Ultrasound Committee, SCCM
- Steering Committee Member, Point of Care Ultrasound Guideline Working Group, SCCM

**Brandon Oto, PA-C, FCCM**

Medical ICU

Bridgeport Hospital, Yale New Haven Health

Bridgeport, CT

- Clinical Instructor, Department of Medicine, Yale School of Medicine
- Instructor, iScan 2022

### **Critical Care Medicine and Pulmonology**

**Cameron Baston, MD, MSCE, FACP**

Division of Pulmonary, Allergy and Critical Care

Penn Medicine

Pennsylvania, PA

- Assistant Professor of Clinical Medicine, Penn Medicine
- Associate Program Director, Pulmonary and Critical Care Medicine Fellowship, Penn Medicine
- Director of Point of Care Ultrasound, Department of Medicine, Penn Medicine
- Faculty Associate Director, Penn Health-Tech

**Steven Fox, MD**

Pulmonology and Critical Care Medicine

University of Alabama at Birmingham

Birmingham, AL

- Assistant Professor of Medicine, University of Alabama at Birmingham School of Medicine

**Frances Mae West, MD, MS, FACP**

Division of Pulmonary, Allergy & Critical Care Medicine

Thomas Jefferson University Hospital

Philadelphia, PA

- Associate Professor of Medicine, Sidney Kimmel Medical College at Thomas Jefferson University
- Program director, Jefferson Pulmonary Disease & Critical Care Medicine Fellowship
- Program director, Internal Medicine Point-of-Care Ultrasound Fellowship, Thomas Jefferson University Hospital
- Course Director, The Resuscitative TEE Workshop
- Founder and course director, Philadelphia Area Critical Care Ultrasound Program Regional Ultrasound Course
- Testamur, NBE Special Competency in Critical Care Echocardiography (CCEeXAM)
- Member, CCEeXAM Committee, NBE

**Family Medicine**

**Paul Bornemann, MD, RMSK, RPVI**

Family Medicine

Lexington Medical Center

West Columbia, SC

- Adjunct Professor of Family Medicine, University of South Carolina School of Medicine
- Director of POCUS Curriculum, Family Medicine and Transitional Year Residency Programs, Lexington Medical Center
- Past director, Primary Care Ultrasound, University of South Carolina School of Medicine
- Founding chair, POCUS Interest Group, AAFP
- Past member, Board of Governors, AIUM
- Author, "Ultrasound for Primary Care"

**Puja Dalal, MD, FAAFP**

Family Medicine

Novant Health

Cornelius, NC

- Director, Point-of-Care Ultrasound, Novant Health Family Medicine Residency
- Core Faculty, POCUS Certificate Program for Educators, Society for Teachers of Family Medicine
- Graduate, Primary Care POCUS Fellowship, Prisma Health/University of South Carolina

- POCUS Instructor, Society for Teachers of Family Medicine
- Vice Chair, POCUS Member Interest Group, AAFP
- POCUS Instructor, AAFP
- Co-founder and co-chair, POCUS Collaborative, Society for Teachers of Family Medicine
- POCUS Instructor, American College of Physicians
- POCUS Instructor, North Carolina Academy of Family Physicians

### **Internal Medicine and Pediatrics**

**Ria Dancel, MD, FACP, SFHM, FAAP**

Division of Hospital Medicine

University of North Carolina at Chapel Hill

Chapel Hill, NC

- Professor of Internal Medicine and Pediatrics, University of North Carolina at Chapel Hill
- Director, Medicine Procedure Service, University of North Carolina at Chapel Hill
- Director, Point-of-Care Ultrasound Education, University of North Carolina at Chapel Hill
- Associate Director, Medicine-Pediatrics Residency Program, University of North Carolina at Chapel Hill

## **Nephrology**

**Abhilash Koratala, MD, FASN**

Division of Nephrology

Medical College of Wisconsin

Milwaukee, WI

- Associate Professor of Medicine, Medical College of Wisconsin
- Director of Clinical Imaging and Social Media, Nephrology, Medical College of Wisconsin
- Testamur, NBE Special Competency in Critical Care Echocardiography (CCEeXAM)
- Member, Guideline writing panel to address the use of ultrasound for adult critically ill and injured patients (focused update 2023), SCCM
- Member, Education Working Group, International Society of Nephrology (ISN)
- Founder, International Alliance for POCUS in Nephrology (IAPN)
- Associate Editor, POCUS Journal
- Chair, POCUS workshop, National Kidney Foundation Spring Clinical Meetings (2022–2024)
- Co-chair, POCUS course, American Society of Nephrology Annual Meeting (2022)
- Member, POCUS certification committee, American Society of Diagnostic and Interventional Nephrology (2020–2022)

## Neurology and Neurocritical Care

**Aarti Sarwal, MD, FNCS, FAAN, FCCM, FASN, RPNI**

Neurology and Neurocritical Care

Atrium Health Wake Forest School of Medicine

Winston-Salem, NC

- Professor of Neurology, Atrium Wake Forest School of Medicine
- Director, Neurovascular Laboratory, Atrium Wake Forest School of Medicine
- Director, Neurovascular Ultrasound Courses (120 CME hours/year), Atrium Wake Forest School of Medicine
- Co-Director, Medical School Ultrasound Curriculum, Atrium Wake Forest School of Medicine
- Assistant Course Director, Point of Care Ultrasound Elective, Atrium Wake Forest School of Medicine
- Member, Ultrasound Committee, SCCM
- Co-Author, COVID-19 update on POCUS applications during the pandemic, ASE [36]
- Co-Author, Expert consensus and recommendations on basic ultrasound skills for intensivists, ESICM [12]
- Member, Guideline writing panel to address the use of ultrasound for adult critically ill and injured patients (focused update 2023), SCCM
- Organizing Chair, 6<sup>th</sup> World Congress of Society of Ultrasound in Medical Education

- Founding chair, Ultrasound Section, Neurocritical Care Society (2020–2022)
- Co-Director, POCUS workshop, Neurocritical Care Society Annual Meeting (2016, 2017, 2019, 2023)
- Co-Director, POCUS workshop, AIUM (2015, 2016)

POCUS: Point of care ultrasound

AAFP: American Academy of Family Physicians

ABEM: American Board of Emergency Medicine

AIUM: American Institute of Ultrasound in Medicine

ACC: American College of Cardiology

ACEP: American College of Emergency Physicians

ASE: American Society of Echocardiography

NBE: National Board of Echocardiography

SCCM: Society of Critical Care Medicine

SEMPA: Society of Emergency Medicine PAs

## Appendix B: Full voting results of consensus statements

| Statement # | This topic is outside my expertise (%) | Strongly disagree (%) | Disagree (%) | Neither agree nor disagree (%) | Agree (%) | Strongly agree (%) | Round consensus reached | Total responses |
|-------------|----------------------------------------|-----------------------|--------------|--------------------------------|-----------|--------------------|-------------------------|-----------------|
| 1           | 0 (0)                                  | 0 (0)                 | 1 (4.2)      | 1 (4.2)                        | 9 (37.5)  | 13 (54.1)          | 1                       | 24              |
| 2           | 0 (0)                                  | 0 (0)                 | 2 (8.3)      | 2 (8.3)                        | 7 (29.2)  | 13 (54.1)          | 1                       | 24              |
| 3           | 0 (0)                                  | 0 (0)                 | 2 (8.3)      | 2 (8.3)                        | 7 (29.2)  | 13 (54.1)          | 1                       | 24              |
| 4           | 0 (0)                                  | 1 (4.2)               | 1 (4.2)      | 2 (8.3)                        | 6 (25.0)  | 14 (58.3)          | 2                       | 24              |
| 5           | 0 (0)                                  | 0 (0)                 | 2 (8.3)      | 1 (4.2)                        | 9 (37.5)  | 12 (50.0)          | 2                       | 24              |



|    |          |          |           |          |           |           |   |    |
|----|----------|----------|-----------|----------|-----------|-----------|---|----|
| 6  | 0 (0)    | 0 (0)    | 1 (4.2)   | 2 (8.3)  | 11 (45.8) | 10 (41.7) | 2 | 24 |
| 7  | 0 (0)    | 0 (0)    | 0 (0)     | 4 (16.7) | 12 (50.0) | 8 (33.3)  | 2 | 24 |
| 8  | 0 (0)    | 0 (0)    | 1 (4.2)   | 2 (8.3)  | 10 (41.7) | 11 (45.8) | 1 | 24 |
| 9  | 0 (0)    | 0 (0)    | 0 (0)     | 4 (16.7) | 7 (29.2)  | 13 (54.2) | 1 | 24 |
| 10 | 0 (0)    | 1 (4.2)  | 0 (0)     | 1 (4.2)  | 9 (37.5)  | 13 (54.2) | 1 | 24 |
| 11 | 0 (0)    | 0 (0)    | 0 (0)     | 0 (0)    | 12 (50.0) | 12 (50.0) | 1 | 24 |
| 12 | 1 (4.2)  | 0 (0)    | 0 (0)     | 0 (0)    | 9 (39.1)  | 14 (60.9) | 2 | 24 |
| 13 | 0 (0)    | 0 (0)    | 1 (4.3)   | 1 (4.3)  | 9 (39.1)  | 12 (52.2) | 3 | 23 |
| 14 | 0 (0)    | 0 (0)    | 0 (0)     | 3 (12.5) | 11 (45.8) | 10 (41.7) | 2 | 24 |
| 15 | 1 (4.3)  | 0 (0)    | 2 (9.1)   | 2 (9.1)  | 11 (50.0) | 7 (31.8)  | 3 | 23 |
| 16 | 0 (0)    | 0 (0)    | 2 (8.3)   | 1 (4.2)  | 9 (37.5)  | 12 (50.0) | 1 | 24 |
| 17 | 0 (0)    | 5 (20.8) | 14 (58.3) | 2 (8.3)  | 2 (8.3)   | 1 (4.2)   | 1 | 24 |
| 18 | 0 (0)    | 1 (4.2)  | 2 (8.3)   | 1 (4.2)  | 10 (41.2) | 10 (41.2) | 2 | 24 |
| 19 | 0 (0)    | 1 (4.2)  | 2 (8.3)   | 0 (0)    | 12 (50.0) | 9 (37.5)  | 2 | 24 |
| 20 | 0 (0)    | 0 (0)    | 1 (4.2)   | 0 (0)    | 12 (50.0) | 11 (45.8) | 2 | 24 |
| 21 | 0 (0)    | 0 (0)    | 1 (4.3)   | 0 (0)    | 10 (43.5) | 12 (52.2) | 3 | 23 |
| 22 | 0 (0)    | 0 (0)    | 2 (8.3)   | 1 (4.2)  | 14 (58.3) | 7 (29.2)  | 2 | 24 |
| 23 | 0 (0)    | 0 (0)    | 2 (8.7)   | 0 (0)    | 16 (69.6) | 5 (21.7)  | 3 | 23 |
| 24 | 1 (4.2)  | 9 (39.1) | 1 (4.3)   | 1 (4.3)  | 13 (56.5) | 8 (34.8)  | 1 | 24 |
| 25 | 4 (16.7) | 0 (0)    | 0 (0)     | 3 (15.0) | 11 (55.0) | 6 (30.0)  | 1 | 24 |
| 26 | 0 (0)    | 0 (0)    | 0 (0)     | 2 (8.3)  | 17 (70.8) | 5 (20.8)  | 2 | 24 |
| 27 | 0 (0)    | 0 (0)    | 0 (0)     | 0 (0)    | 6 (25.0)  | 18 (75.0) | 1 | 24 |
| 28 | 0 (0)    | 0 (0)    | 0 (0)     | 0 (0)    | 10 (43.5) | 13 (56.5) | 3 | 23 |
| 29 | 0 (0)    | 1 (4.3)  | 3 (13.0)  | 0 (0)    | 12 (52.2) | 7 (30.4)  | 3 | 23 |
| 30 | 0 (0)    | 1 (4.2)  | 1 (4.2)   | 2 (8.3)  | 15 (62.5) | 5 (20.8)  | 2 | 24 |
| 31 | 0 (0)    | 0 (0)    | 0 (0)     | 0 (0)    | 8 (33.3)  | 16 (66.6) | 1 | 24 |
| 32 | 0 (0)    | 0 (0)    | 1 (4.3)   | 2 (8.7)  | 12 (52.2) | 8 (34.8)  | 1 | 23 |
| 33 | 0 (0)    | 0 (0)    | 0 (0)     | 3 (13.0) | 9 (39.1)  | 11 (47.8) | 1 | 23 |
| 34 | 0 (0)    | 7 (30.4) | 11 (48.8) | 1 (4.3)  | 3 (13.0)  | 1 (4.3)   | 3 | 23 |
| 35 | 0 (0)    | 1 (4.3)  | 0 (0)     | 2 (8.7)  | 2 (8.7)   | 18 (78.3) | 1 | 23 |
| 36 | 0 (0)    | 0 (0)    | 1 (4.3)   | 3 (13.0) | 9 (39.1)  | 10 (43.5) | 1 | 23 |
| 37 | 0 (0)    | 0 (0)    | 0 (0)     | 1 (4.3)  | 21 (91.3) | 1 (4.3)   | 2 | 23 |
| 38 | 0 (0)    | 0 (0)    | 0 (0)     | 3 (13.0) | 10 (43.5) | 10 (43.5) | 2 | 23 |
| 39 | 0 (0)    | 0 (0)    | 1 (4.3)   | 1 (4.3)  | 15 (65.2) | 6 (26.0)  | 2 | 23 |
| 40 | 0 (0)    | 0 (0)    | 0 (0)     | 0 (0)    | 14 (60.9) | 9 (39.1)  | 2 | 23 |
| 41 | 0 (0)    | 9 (39.1) | 10 (43.5) | 0 (0)    | 2 (8.7)   | 2 (8.7)   | 1 | 23 |
| 42 | 0 (0)    | 0 (0)    | 1 (4.3)   | 0 (0)    | 4 (17.4)  | 18 (78.3) | 1 | 23 |
| 43 | 0 (0)    | 2 (8.7)  | 0 (0)     | 0 (0)    | 16 (69.6) | 5 (21.7)  | 3 | 23 |
| 44 | 0 (0)    | 0 (0)    | 0 (0)     | 1 (4.3)  | 6 (26.0)  | 16 (69.6) | 2 | 23 |
| 45 | 0 (0)    | 0 (0)    | 1 (4.3)   | 1 (4.3)  | 14 (60.9) | 7 (30.4)  | 2 | 23 |
| 46 | 0 (0)    | 0 (0)    | 2 (8.7)   | 2 (8.7)  | 9 (39.1)  | 10 (43.5) | 1 | 23 |
| 47 | 0 (0)    | 0 (0)    | 1 (4.3)   | 2 (8.7)  | 9 (39.1)  | 11 (47.8) | 1 | 23 |
| 48 | 0 (0)    | 0 (0)    | 3 (13.0)  | 2 (8.7)  | 11 (47.8) | 7 (30.4)  | 1 | 23 |
| 49 | 0 (0)    | 1 (4.3)  | 0 (0)     | 2 (8.7)  | 11 (47.8) | 9 (39.1)  | 1 | 23 |
| 50 | 0 (0)    | 0 (0)    | 1 (4.3)   | 2 (8.7)  | 12 (52.2) | 8 (34.8)  | 2 | 23 |
| 51 | 0 (0)    | 1 (4.3)  | 0 (0)     | 0 (0)    | 2 (8.7)   | 20 (87.0) | 1 | 23 |
| 52 | 0 (0)    | 6 (26.0) | 13 (56.5) | 1 (4.3)  | 2 (8.7)   | 1 (4.3)   | 1 | 23 |
| 53 | 0 (0)    | 0 (0)    | 1 (4.3)   | 1 (4.3)  | 6 (26.0)  | 15 (65.2) | 1 | 23 |
| 54 | 0 (0)    | 0 (0)    | 1 (4.3)   | 0 (0)    | 15 (65.2) | 7 (30.4)  | 1 | 23 |
| 55 | 0 (0)    | 0 (0)    | 0 (0)     | 0 (0)    | 13 (56.5) | 10 (43.5) | 1 | 23 |
| 56 | 0 (0)    | 0 (0)    | 1 (4.3)   | 3 (13.0) | 11 (47.8) | 8 (34.8)  | 1 | 23 |
| 57 | 0 (0)    | 7 (30.4) | 12 (52.2) | 3 (13.0) | 9 (39.1)  | 1 (4.3)   | 1 | 23 |
